# Supplementary material for: Effect on Adipose Tissue of Diabetic Mice Supplemented with n-3 Fatty Acids Extracted from Microalgae
Source: PubMed Central journal article supplement — Endocr Metab Immune Disord Drug Targets. 2020 Jun;20(5):728–35. doi: 10.2174/1871530320666200213111452 (PMC7360907; doi:10.2174/1871530320666200213111452), 2020-06
Supplement: EMIDDT-20-728_SD1.pdf [file EMIDDT-20-728_SD1.pdf]

## SUPPLEMENTARY MATERIAL

### Effect on Adipose Tissue of Diabetic Mice Supplemented with *n-3* Fatty Acids Extracted from Microalgae

Laura E. Gutiérrez-Pliego<sup>1</sup>, Beatriz E. Martínez-Carrillo<sup>1</sup>, Aldo A. Reséndiz-Albor<sup>2</sup> and Roxana Valdés-Ramos<sup>1,\*</sup>

<sup>1</sup>School of Medicine, Universidad Autónoma del Estado de México. Paseo Tollocan y Venustiano Carranza s/n, Col. Moderna de la Cruz, 50180 Toluca, Mex. Mexico; <sup>2</sup>Laboratory of Mucosal Immunity, Research and Graduate Section, Superior School of Medicine, Instituto Politécnico Nacional. Av. Plan de San Luis s/n, Col. Casco de Santo Tomás, Miguel Hidalgo 11350. Ciudad de Mexico. Mexico

**Supplementary Table 1. Nutrient composition of study groups' diet.**

|                                            | RC   | MD   | LY   | CO   |
|--------------------------------------------|------|------|------|------|
| Protein, %                                 | 23.9 | 23.9 | 23.9 | 23.9 |
| Starch, %                                  | 31.9 | 31.9 | 31.9 | 31.9 |
| Glucose, %                                 | 0.22 | 0.22 | 0.22 | 0.22 |
| Fiber (crude), %                           | 5.10 | 5.10 | 5.10 | 5.10 |
| Cholesterol, ppm                           | 200  | 200  | 200  | 200  |
| EPA + DHA, %                               | 0.2  | 2.0  | 0.2  | 0.2  |
| Metabolizable Energy, kcal/g               | 3.02 | 3.07 | 3.02 | 3.02 |
| Additional energy from supplement, kcal/mg | 0    | 0    | 0.09 | 0.09 |

RC, LY & CO consumed Rodent Laboratory Chow 5001 from Purina [3.02 kcal/g]. Lyophilized *n-3* fatty acids from microalgae were delivered by oral gavage and doses were adjusted by weight at 1mg/g for the LY group. Coconut oil was delivered by oral gavage and doses were adjusted by weight at 1mg/g for the CO group. MD consumed Rodent Laboratory Chow 5001 from Purina [3.02 kcal/g] modified with 2.0% *n-3* EPA & DHA meaning 10x of the original content.
